# Supplementary material for: Rethinking childhood ependymoma: a retrospective, multi-center analysis reveals poor long-term overall survival
Source: Springer Nature journal article supplement (doi:10.1007/s11060-017-2568-8), 2017-07-21

## Overall Survival by Site

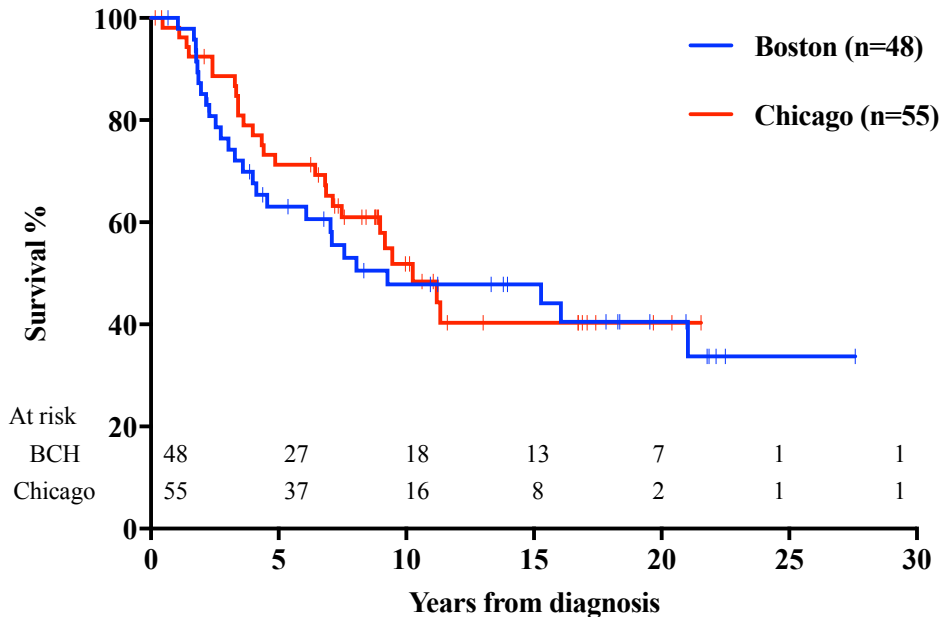

Supplement: MOESM1 [file 13320974]
