# Supplementary material for: Rethinking childhood ependymoma: a retrospective, multi-center analysis reveals poor long-term overall survival
Source: Springer Nature journal article supplement (doi:10.1007/s11060-017-2568-8), 2017-07-21
Supplement: MOESM2 [file 13320974]

Supplemental Table 1: Patient demographic and clinical characteristics for SEER cohort (n=360)

| <b>Demographic and clinical characteristics</b> |         | <b>Frequency (%)</b> |
|-------------------------------------------------|---------|----------------------|
| Age (years)                                     | <1      | 30 (8)               |
|                                                 | 1-4     | 149 (41)             |
|                                                 | 5-9     | 84 (23)              |
|                                                 | 10-14   | 51 (13)              |
|                                                 | 15-19   | 46 (13)              |
| Gender                                          | Male    | 206 (57)             |
| Tumor grade                                     | II      | 82 (23)              |
|                                                 | III     | 278 (77)             |
| Adjuvant XRT                                    | Yes     | 241 (67)             |
|                                                 | No      | 112 (31)             |
|                                                 | Unknown | 7 (2)                |

Supplemental Table 2: Histopathologic features of ependymomas at DFCI/BCH (n=48)

| <b>Histopathologic feature</b>  | <b>Frequency (%)</b>  |         |
|---------------------------------|-----------------------|---------|
| <b>Architecture</b>             | Well differentiated   | 13 (27) |
|                                 | Poorly differentiated | 23 (48) |
|                                 | Dedifferentiated      | 12 (25) |
| <b>Necrosis</b>                 | Yes                   | 37 (77) |
| <b>Vascular proliferation</b>   | Yes                   | 29 (60) |
| <b>P53 status</b>               | Positive              | 28 (58) |
| <b>Bcl-2 status</b>             | Positive              | 42 (88) |
| <b>MIB-1 LI</b>                 | $\geq 20.5$           | 17 (35) |
| <b>Topo-II alpha expression</b> | $\geq 9.4$            | 14 (29) |
| <b>Mitotic index</b>            | $>10$                 | 8 (17)  |
| <b>Cyclin D expression</b>      | Positive              | 36 (75) |
